# Supplementary material for: Plasmono-magnetic material for precise photothermal heating
Source: Royal Society of Chemistry journal article supplement (doi:10.1039/c7ra08276b), 2018-01-01
Supplement: c7ra08276b1.pdf [file c7ra08276b1.pdf]

## Plasmono-magnetic Material for Precise Photothermal Heating

*Mikhail Ladanov<sup>1+</sup>, Surya Cheemalapati<sup>1+</sup>, Hao Wang<sup>1</sup>, Yuan Yuan<sup>1</sup>, Piyush Koria<sup>1</sup>, and Anna*

*Pyayt<sup>1\*</sup>*

Department of Chemical and Biomedical Engineering, University of South Florida, Tampa, FL  
33647, USA

*<sup>+</sup>Indicates equal contributions*

**KEYWORDS** Gold nanocages, plasmonic heating, magnetic microbeads

**SUPPLEMENTARY INFORMATION**

Temperatures of the suspensions of the magnetic beads decorated with gold nanocages was determined using a transfer function with the values shown in Table 1 and plot in figure S1. The relationship between image luminosity and the temperature can be described using equation (1). The luminosity  $L$  at any given temperature is a function of the minimum luminosity ( $L_2$ ), maximum luminosity ( $L_1$ ) and the transition constants. Transition temperature,  $T_t$  is the center of the linear slope where maximum luminosity change occurs over temperature change  $dT$ .

**Table S1.** The luminosity  $L_1$  at 25 °C and  $L_2$  at 42 °C extracted from the Figure 3. The rest of luminosity values at different temperatures were estimated using Equation (1) and plotted in Figure S1.

| <b>Figure 3</b>          |           |                          |                     |
|--------------------------|-----------|--------------------------|---------------------|
| <b>Temperature (° C)</b> |           | <b>Luminosity (a.u.)</b> |                     |
| <b>Maximum</b>           | <b>42</b> | <b>38.00</b>             | <b>L2 (Minimum)</b> |
|                          | 41        | 38.01                    |                     |
|                          | 40        | 38.03                    |                     |
|                          | 39        | 38.09                    |                     |
|                          | 38        | 38.24                    |                     |
|                          | 37        | 38.65                    |                     |
|                          | 36        | 39.75                    |                     |
|                          | 35        | 42.56                    |                     |
|                          | 34        | 49.19                    |                     |
|                          | 33        | 62.07                    |                     |
|                          | 32        | 79.77                    |                     |
|                          | 31        | 95.25                    |                     |
|                          | 30        | 104.29                   |                     |
|                          | 29        | 108.38                   |                     |
|                          | 28        | 110.01                   |                     |
|                          | 27        | 110.63                   |                     |
|                          | 26        | 110.86                   |                     |
| <b>Minimum</b>           | <b>25</b> | <b>111.00</b>            | <b>L1 (Maximum)</b> |

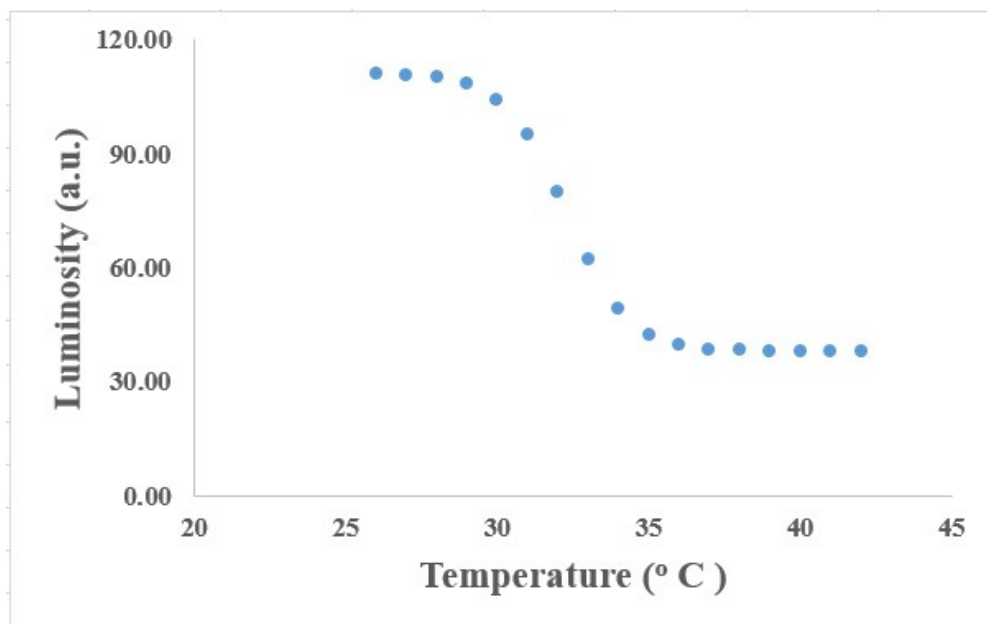

**Figure S1.** The luminosity-temperature transfer function for the experiment shown in Figure 3 corresponding to the data from Table S1.
